# Supplementary material for: Synthesis, characterization and catalytic ATP-hydrolysis of two tetrairon(iii) complexes bridged by succinate/terephthalate with tris(2-benzimidazolylmethyl) amineElectronic supplementary information (ESI) available: Fig. S1: 1H NMR spectrum of 2 in d6-DMSO at room temperature. See http://www.rsc.org/suppdata/dt/b3/b303369b/
Source: Royal Society of Chemistry journal article supplement (doi:10.1039/b303369b), 2003-01-01
Supplement: b303369b.doc [file b303369b.doc]

**Supporting Information**

**Synthesis, characterization and catalytic ATP-hydrolysis of two tetrairon(III) complexes bridged by succinate/terephthalate with tris(2-benzimidazolylmethyl) amine**

Dong-feng Li, Zhan-ru Liao,* Yong-ge Wei, Fei Du, Ming Wang, Wen-xue Chen, Wu-ke Li and Xi-an Mao


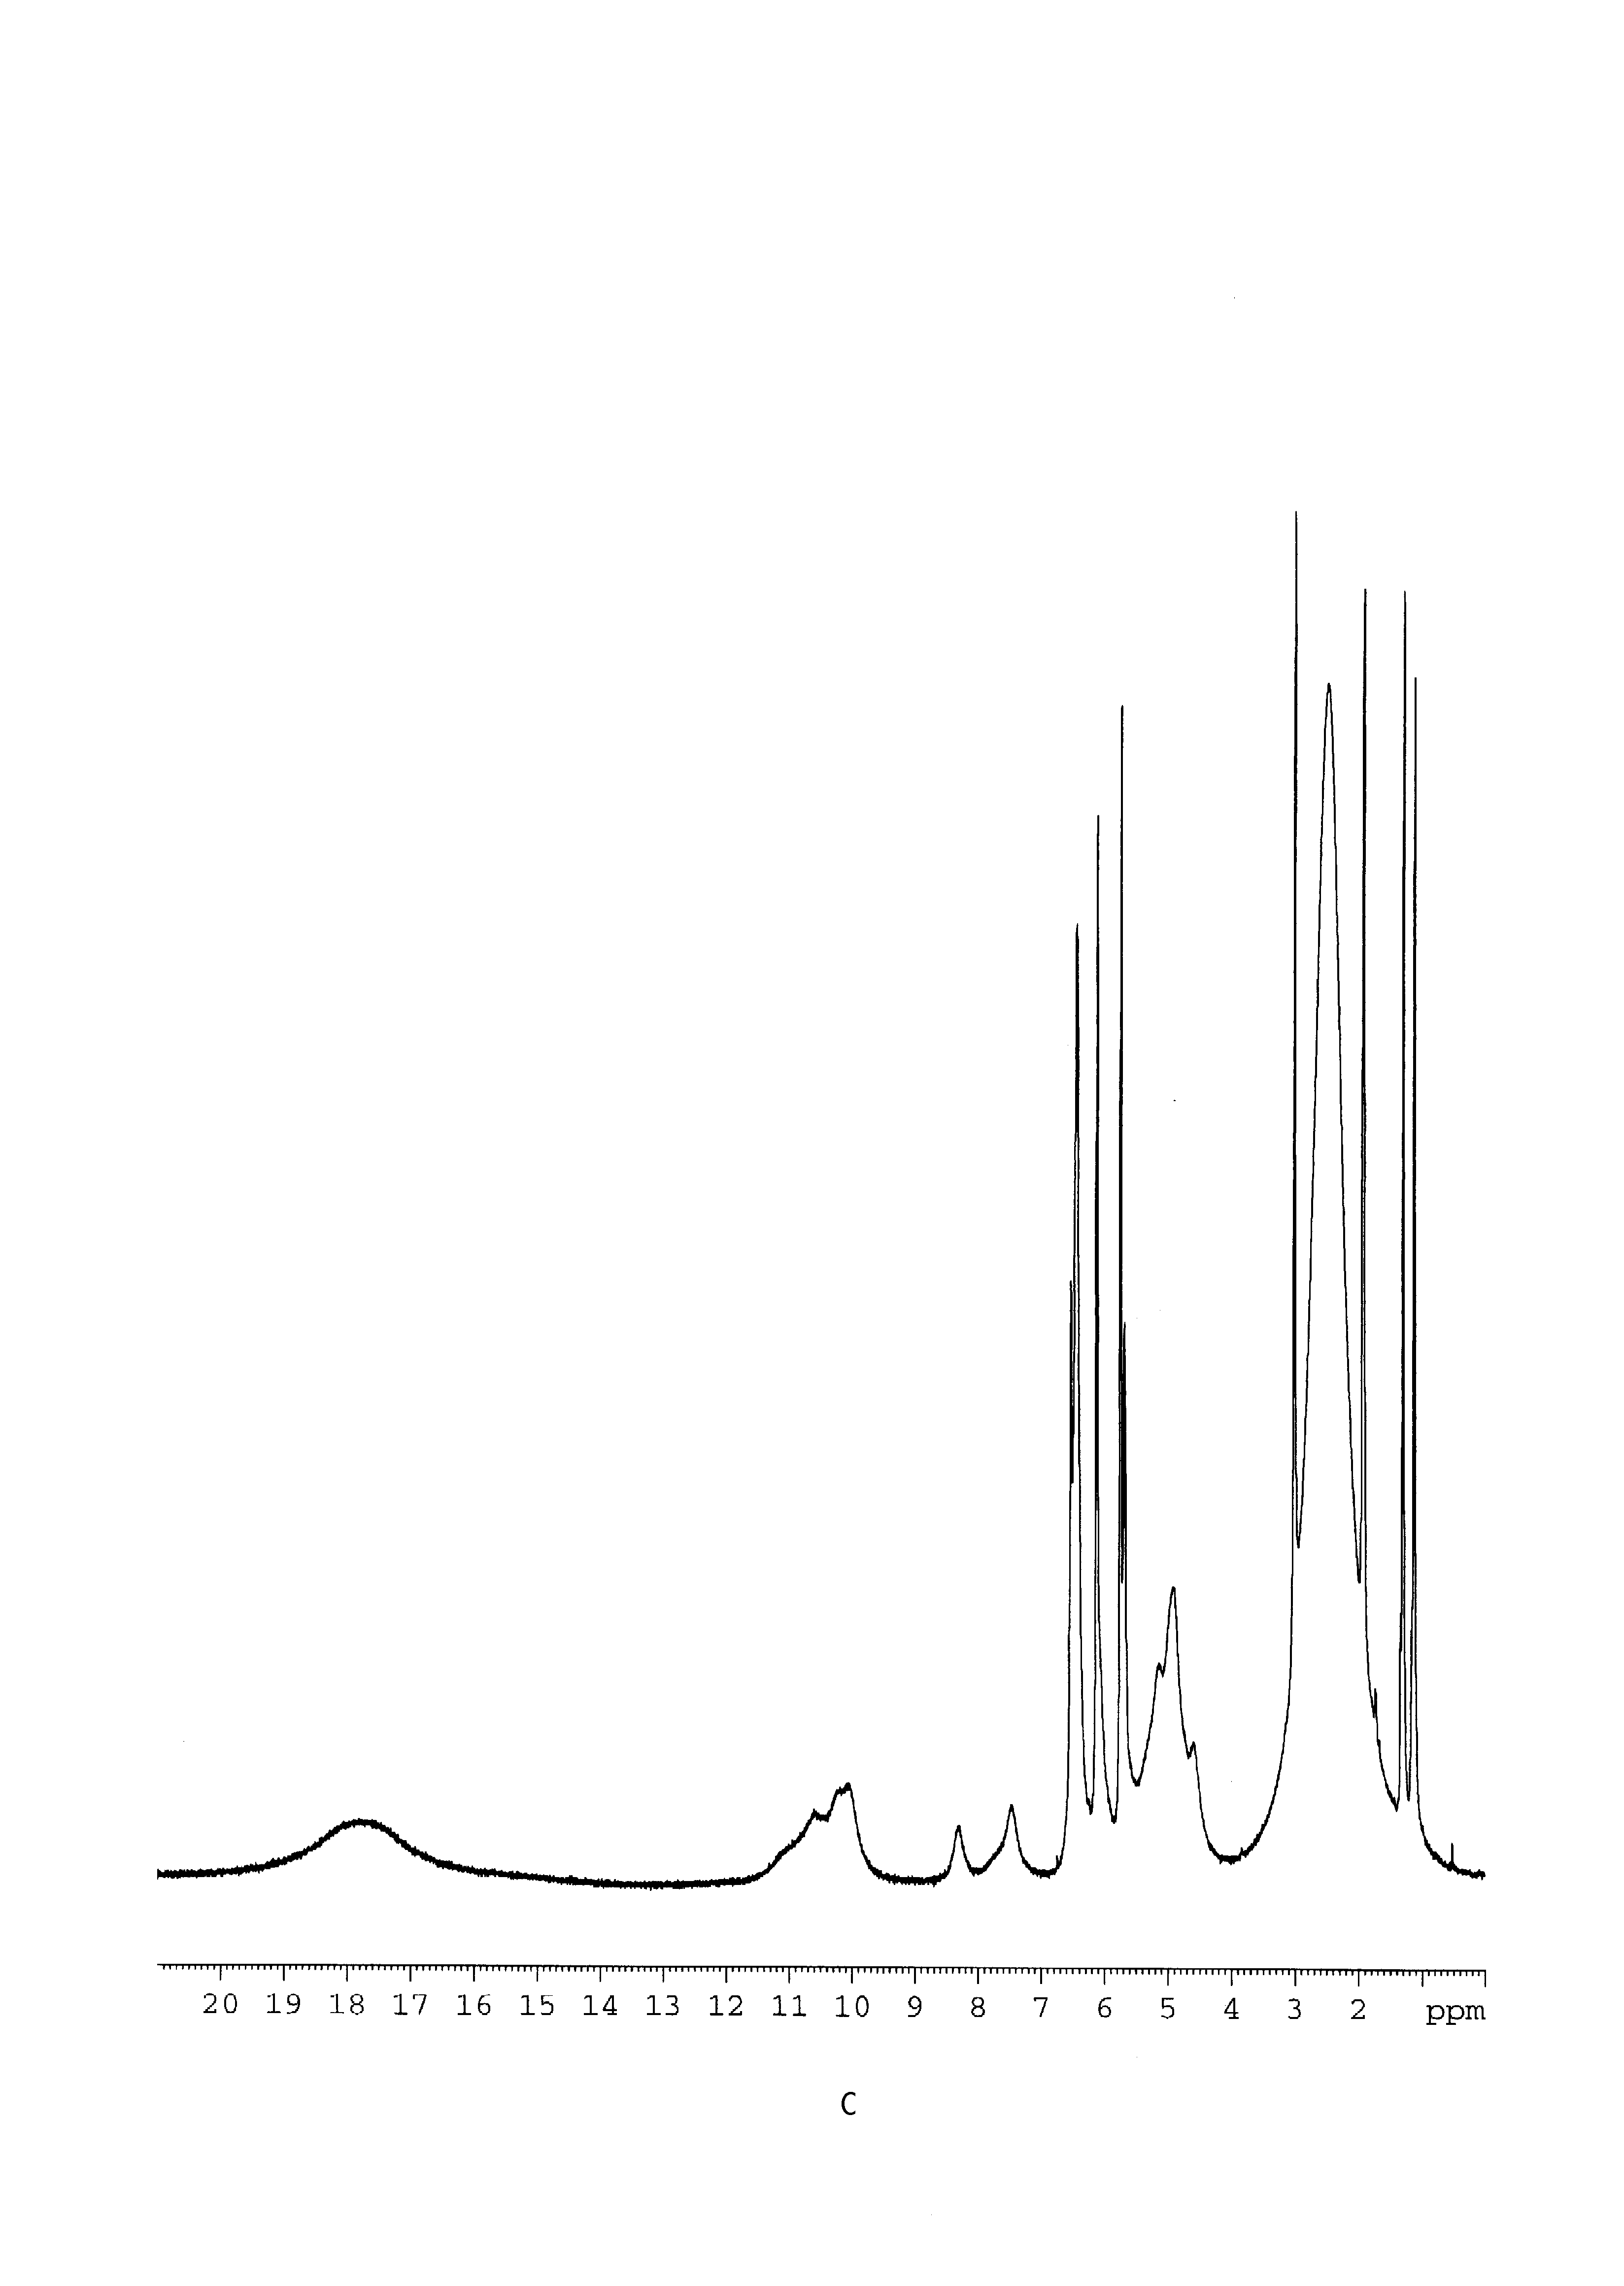


**Figure S1.** 1H NMR spectrum of **2** in *d*6-DMSO at room temperature.
